# Supplementary material for: Genomic diversity and clinical relevance of Mycobacterium simiae
Source: PubMed Central journal article supplement — ERJ Open Res. 2024 Mar 18;10(2):00773-2023. doi: 10.1183/23120541.00773-2023 (PMC10945383; doi:10.1183/23120541.00773-2023), 2024-03-18
Supplement: 00773-2023.SUPPLEMENT.pdf [file 00773-2023.SUPPLEMENT.pdf]

## Supplementary Table

Table S1: Included sequences from this study and available public data.

| Sample ID                          | Accession     | Species                    | Origin   | Country     | Sequence source | Year of sampling | Patient ID |
|------------------------------------|---------------|----------------------------|----------|-------------|-----------------|------------------|------------|
| ntmscope_S_1                       | 22006447      | <i>M. simiae</i>           | human    | Germany     | This study      | 2006             | P1         |
| ntmscope_S_2                       | 22006448      | <i>M. simiae</i>           | human    | Germany     | This study      | 2007             | P1         |
| ntmscope_S_3                       | 22006449      | <i>M. simiae</i>           | human    | Germany     | This study      | 2008             | P1         |
| ntmscope_S_5                       | 22006450      | <i>M. simiae</i>           | human    | Germany     | This study      | 2010             | P1         |
| ntmscope_S_6                       | 22006451      | <i>M. simiae</i>           | human    | Germany     | This study      | 2011             | P1         |
| ntmscope_S_7                       | 22006452      | <i>M. simiae</i>           | human    | Germany     | This study      | 2011             | P1         |
| ntmscope_S_8                       | 23002049      | <i>M. simiae</i>           | human    | Germany     | This study      | 2011             | P2         |
| ntmscope_S_9                       | 23002050      | <i>M. simiae</i>           | human    | Germany     | This study      | 2011             | P3         |
| ntmscope_S_10                      | 22006455      | <i>M. simiae</i>           | human    | Germany     | This study      | 2012             | P1         |
| ntmscope_S_11                      | 23002051      | <i>M. simiae</i>           | human    | Germany     | This study      | 2012             | P4         |
| ntmscope_S_12                      | 22006457      | <i>M. simiae</i>           | human    | Germany     | This study      | 2013             | P1         |
| ntmscope_S_14                      | 22006459      | <i>M. simiae</i>           | human    | Germany     | This study      | 2014             | P1         |
| ntmscope_S_15                      | 22006460      | <i>M. simiae</i>           | human    | Germany     | This study      | 2015             | P1         |
| ntmscope_S_16                      | 22006461      | <i>M. simiae</i>           | human    | Germany     | This study      | 2015             | P1         |
| ntmscope_S_17                      | 22006462      | <i>M. simiae</i>           | human    | Germany     | This study      | 2015             | P5         |
| ntmscope_S_18                      | 22006463      | <i>M. simiae</i>           | human    | Germany     | This study      | 2015             | P1         |
| ntmscope_S_19                      | 22006464      | <i>M. simiae</i>           | human    | Germany     | This study      | 2015             | P1         |
| ntmscope_S_20                      | 23002052      | <i>M. simiae</i>           | human    | Germany     | This study      | 2015             | P5         |
| ntmscope_S_21                      | 22006466      | <i>M. simiae</i>           | human    | Germany     | This study      | 2015             | P6         |
| ntmscope_S_22                      | 23002053      | <i>M. simiae</i>           | human    | Germany     | This study      | 2016             | P1         |
| ntmscope_S_23                      | 22006468      | <i>M. simiae</i>           | human    | Germany     | This study      | 2016             | P6         |
| ntmscope_S_24                      | 22006469      | <i>M. simiae</i>           | human    | Germany     | This study      | 2016             | P1         |
| ntmscope_S_25                      | 22006470      | <i>M. simiae</i>           | human    | Germany     | This study      | 2016             | P5         |
| ntmscope_S_26                      | 22006471      | <i>M. simiae</i>           | human    | Germany     | This study      | 2016             | P7         |
| ntmscope_S_27                      | 22006472      | <i>M. simiae</i>           | human    | Germany     | This study      | 2016             | P5         |
| ntmscope_S_28                      | 22006473      | <i>M. simiae</i>           | human    | Germany     | This study      | 2017             | P6         |
| ntmscope_S_29                      | 22006474      | <i>M. simiae</i>           | human    | Germany     | This study      | 2018             | P1         |
| ntmscope_S_30                      | 22006475      | <i>M. simiae</i>           | human    | Germany     | This study      | 2018             | P1         |
| ntmscope_S_31                      | 22006476      | <i>M. simiae</i>           | human    | Germany     | This study      | 2018             | P1         |
| ntmscope_S_33                      | 22006478      | <i>M. simiae</i>           | human    | Germany     | This study      | 2018             | P1         |
| ntmscope_S_34                      | 22006479      | <i>M. simiae</i>           | human    | Germany     | This study      | 2018             | P1         |
| ntmscope_S_35                      | 22006480      | <i>M. simiae</i>           | human    | Germany     | This study      | 2019             | P1         |
| ntmscope_S_36                      | 22006481      | <i>M. simiae</i>           | human    | Germany     | This study      | 2019             | P1         |
| ntmscope_S_39                      | 23001063      | <i>M. interjectum</i>      | human    | Germany     | This study      | 2019             | P11        |
| ntmscope_S_40                      | 23001064      | <i>M. interjectum</i>      | human    | Germany     | This study      | 2020             | P12        |
| ntmscope_S_41                      | 23001065      | <i>M. palustre</i>         | human    | Germany     | This study      | 2021             | P13        |
| JCM 12377 / DSM 44165 / ATCC 25275 | DRR161197     | <i>M. simiae</i>           | zoonotic | India       | Public          | NA               | NA         |
| MsiGto                             | GCA0020930751 | <i>M. simiae</i>           | human    | Mexico      | Public          | NA               | NA         |
| JAL-560-SIM                        | GCA0083706451 | <i>M. simiae</i>           | human    | India       | Public          | NA               | NA         |
| ATCC 51234                         | SRR1801752    | <i>M. genavense</i>        | human    | Switzerland | Public          | NA               | NA         |
| ATCC BAA-614                       | GCA0001641351 | <i>M. parascrofulaceum</i> | human    | USA         | Public          | NA               | NA         |
| JCM 17783 / DSM 45059              | DRR161230     | <i>M. stomatepieae</i>     | zoonotic | UK          | Public          | NA               | NA         |
| AFP003 / JCM 18430                 | GCA9001762552 | <i>M. ahvazicum</i>        | human    | Iran        | Public          | NA               | NA         |

|                                                          |               |                            |               |                   |        |      |    |
|----------------------------------------------------------|---------------|----------------------------|---------------|-------------------|--------|------|----|
| DSM 44602 /<br>ATCC BAA-256 /<br>CIP 108974              | GCA0258232551 | <i>M. montefiorensis</i>   | zoonotic      | USA               | Public | NA   | NA |
| BS                                                       | GCA0031127751 | <i>M. montefiorensis</i>   | zoonotic      | Japan             | Public | NA   | NA |
| NJB14195                                                 | DRR357477     | <i>M. montefiorensis</i>   | zoonotic      | Japan             | Public | NA   | NA |
| JCM 32072 / DSM<br>46748 / UN-152                        | GCA0023563151 | <i>M. shigaense</i>        | human         | Japan             | Public | NA   | NA |
| SCY                                                      | GCA0035156451 | <i>M. shigaense</i>        | human         | China             | Public | NA   | NA |
| JCM 14742 / DSM<br>44553                                 | DRR161215     | <i>M. parmense</i>         | human         | Italy             | Public | NA   | NA |
| DSM 44572                                                | GCA0258214851 | <i>M. palustre</i>         | environmental | Finland           | Public | NA   | NA |
| JCM 13016 / DSM<br>44616                                 | DRR161205     | <i>M. saskatchewanense</i> | human         | Canada            | Public | NA   | NA |
| JCM 13573 / DSM<br>44627 / CIP<br>106428                 | DRR161209     | <i>M. kubicae</i>          | human         | USA               | Public | NA   | NA |
| NJH_MKUB1                                                | GCA0142633151 | <i>M. kubicae</i>          | human         | USA               | Public | NA   | NA |
| NJH_MKUB2                                                | GCA0142633351 | <i>M. kubicae</i>          | human         | USA               | Public | NA   | NA |
| DSM 46749 /<br>IEC26                                     | GCA0258233851 | <i>M. paraense</i>         | human         | Brazil            | Public | NA   | NA |
| FI-07156                                                 | GCA0021022951 | <i>M. paraense</i>         | human         | Italy             | Public | NA   | NA |
| IEC33                                                    | GCA0021018251 | <i>M. paraense</i>         | human         | Brazil            | Public | NA   | NA |
| FI-10043                                                 | GCA0021023051 | <i>M. paraense</i>         | human         | Italy             | Public | NA   | NA |
| JCM 14749 / DSM<br>44852                                 | DRR161214     | <i>M. florentinum</i>      | human         | Italy             | Public | NA   | NA |
| JCM 14842 / DSM<br>44471                                 | DRR161216     | <i>M. heidelbergense</i>   | human         | Germany           | Public | NA   | NA |
| BAA-832 / DSM<br>45441                                   | GCA0021023551 | <i>M. sherrisii</i>        | human         | Germany           | Public | NA   | NA |
| BC1_M4                                                   | GCA0017223251 | <i>M. sherrisii</i>        | human         | USA               | Public | NA   | NA |
| DSM 44049                                                | GCA0258220651 | <i>M. intermedium</i>      | human         | Germany           | Public | NA   | NA |
| HMC2_M5                                                  | GCA0017223451 | <i>M. intermedium</i>      | human         | USA               | Public | NA   | NA |
| ATCC 51457T /<br>DSM 44064                               | GCA0258214151 | <i>M. interjectum</i>      | human         | Germany           | Public | NA   | NA |
| DSM 45397 /<br>FI95228                                   | GCA0021021551 | <i>M. europaeum</i>        | human         | Italy             | Public | NA   | NA |
| CSUR P1344                                               | GCA0013735151 | <i>M. europaeum</i>        | human         | France            | Public | NA   | NA |
| ATCC 51985                                               | SRR21133400   | <i>M. lentiflavum</i>      | human         | Germany           | Public | NA   | NA |
| CSUR P1491                                               | GCA0013733951 | <i>M. lentiflavum</i>      | human         | France            | Public | NA   | NA |
| DSM 44626                                                | GCA0021024151 | <i>M. triplex</i>          | human         | USA               | Public | NA   | NA |
|                                                          | ERR6397219    | <i>M. simiae</i>           | human         | Ethiopia          | Public | NA   | NA |
| 24_Tigray_TB                                             | ERR6397169    | <i>M. simiae</i>           | human         | Ethiopia          | Public | NA   | NA |
| SAKAN MW_1                                               | SRR12285193   | <i>M. simiae</i>           | human         | India             | Public | NA   | NA |
| 22b08e69-675c-<br>4c13-8069-<br>8eb1079be380             | SRR6045477    | <i>M. simiae</i>           | human         | UK                | Public | NA   | NA |
| SAMD00013969                                             | DRR016026     | <i>M. lentiflavum</i>      | unknown       | Japan             | Public | NA   | NA |
| SAMD00013336                                             | DRR016032     | <i>M. triplex</i>          | unknown       | Japan             | Public | NA   | NA |
| MMMOSAM:d904d<br>2c1-3b0d-4c6c-<br>90b1-<br>5d8efa060272 | SRR6045747    | <i>M. lentiflavum</i>      | human         | United<br>Kingdom | Public | 2016 | NA |
| SAMD00200838                                             | DRR205177     | <i>M. shigaense</i>        | human         | Japan             | Public | 2018 | NA |
| SAMD00200837                                             | DRR205178     | <i>M. shigaense</i>        | human         | Japan             | Public | 2019 | NA |
| myc97                                                    | SRR5052582    | <i>M. genavense</i>        | zoonotic      | USA               | Public | 2005 | NA |
| myc132                                                   | SRR5052583    | <i>M. genavense</i>        | zoonotic      | USA               | Public | 2004 | NA |
| myc88                                                    | SRR5052584    | <i>M. genavense</i>        | zoonotic      | USA               | Public | 1997 | NA |
| myc68                                                    | SRR5052586    | <i>M. genavense</i>        | zoonotic      | USA               | Public | 2014 | NA |
| myc95                                                    | SRR5052587    | <i>M. genavense</i>        | zoonotic      | USA               | Public | 2004 | NA |
| myc74                                                    | SRR5052589    | <i>M. genavense</i>        | zoonotic      | USA               | Public | 2004 | NA |

|                     |             |                            |          |       |        |      |    |
|---------------------|-------------|----------------------------|----------|-------|--------|------|----|
| myc108              | SRR5052590  | <i>M. genavense</i>        | zoonotic | USA   | Public | 1998 | NA |
| myc101              | SRR5052591  | <i>M. genavense</i>        | zoonotic | USA   | Public | 2006 | NA |
| myc73               | SRR5052592  | <i>M. genavense</i>        | zoonotic | USA   | Public | 2004 | NA |
| myc117              | SRR5052594  | <i>M. genavense</i>        | zoonotic | USA   | Public | 2007 | NA |
| myc75               | SRR5052595  | <i>M. genavense</i>        | zoonotic | USA   | Public | 2004 | NA |
| myc128              | SRR5052596  | <i>M. genavense</i>        | zoonotic | USA   | Public | 2014 | NA |
| myc130              | SRR5052597  | <i>M. genavense</i>        | zoonotic | USA   | Public | 2010 | NA |
| myc102              | SRR5052599  | <i>M. genavense</i>        | zoonotic | USA   | Public | 2007 | NA |
| myc105              | SRR5052600  | <i>M. genavense</i>        | zoonotic | USA   | Public | 2004 | NA |
| myc127              | SRR5052602  | <i>M. genavense</i>        | zoonotic | USA   | Public | 2015 | NA |
| myc115              | SRR5052604  | <i>M. genavense</i>        | zoonotic | USA   | Public | 2004 | NA |
| myc110              | SRR5052606  | <i>M. genavense</i>        | zoonotic | USA   | Public | 2012 | NA |
| myc93               | SRR5052609  | <i>M. genavense</i>        | zoonotic | USA   | Public | 1996 | NA |
| myc70               | SRR5052612  | <i>M. genavense</i>        | zoonotic | USA   | Public | 2004 | NA |
| myc72               | SRR5052613  | <i>M. genavense</i>        | zoonotic | USA   | Public | 2006 | NA |
| myc99               | SRR5052614  | <i>M. genavense</i>        | zoonotic | USA   | Public | 2008 | NA |
| myc91               | SRR5052615  | <i>M. genavense</i>        | zoonotic | USA   | Public | 2008 | NA |
| myc71               | SRR5052617  | <i>M. genavense</i>        | zoonotic | USA   | Public | 2002 | NA |
| myc122              | SRR5052618  | <i>M. genavense</i>        | zoonotic | USA   | Public | 2012 | NA |
| myc98               | SRR5052619  | <i>M. genavense</i>        | zoonotic | USA   | Public | 2012 | NA |
| myc83               | SRR5052620  | <i>M. genavense</i>        | zoonotic | USA   | Public | 2011 | NA |
| myc125              | SRR5052621  | <i>M. genavense</i>        | zoonotic | USA   | Public | 2015 | NA |
| myc103              | SRR5052622  | <i>M. genavense</i>        | zoonotic | USA   | Public | 2015 | NA |
| myc78               | SRR5052623  | <i>M. genavense</i>        | zoonotic | USA   | Public | 2008 | NA |
| myc79               | SRR5052624  | <i>M. genavense</i>        | zoonotic | USA   | Public | 2010 | NA |
| myc131              | SRR5052627  | <i>M. genavense</i>        | zoonotic | USA   | Public | 2015 | NA |
| myc129              | SRR5052628  | <i>M. genavense</i>        | zoonotic | USA   | Public | 2014 | NA |
| myc119              | SRR5052629  | <i>M. genavense</i>        | zoonotic | USA   | Public | 2012 | NA |
| myc82               | SRR5052630  | <i>M. genavense</i>        | zoonotic | USA   | Public | 2011 | NA |
| myc89               | SRR5052631  | <i>M. genavense</i>        | zoonotic | USA   | Public | 2000 | NA |
| myc106              | SRR5052633  | <i>M. genavense</i>        | zoonotic | USA   | Public | 2015 | NA |
| myc112              | SRR5052634  | <i>M. genavense</i>        | zoonotic | USA   | Public | 1995 | NA |
| myc114              | SRR5052635  | <i>M. genavense</i>        | zoonotic | USA   | Public | 2015 | NA |
| myc109              | SRR5052636  | <i>M. genavense</i>        | zoonotic | USA   | Public | 2014 | NA |
| myc107              | SRR5052637  | <i>M. genavense</i>        | zoonotic | USA   | Public | 1996 | NA |
| myc81               | SRR5052640  | <i>M. genavense</i>        | zoonotic | USA   | Public | 2010 | NA |
| myc100              | SRR5052641  | <i>M. genavense</i>        | zoonotic | USA   | Public | 2007 | NA |
| myc113              | SRR5052643  | <i>M. genavense</i>        | zoonotic | USA   | Public | 2015 | NA |
| myc47               | SRR5043010  | <i>M. genavense</i>        | zoonotic | USA   | Public | 2014 | NA |
| SP1876              | SRR23562882 | <i>M. saskatchewanense</i> | zoonotic | Italy | Public | 2022 | NA |
| CF00071-00221.MLENT | SRR7800693  | <i>M. lentiflavum</i>      | human    | USA   | Public | 1905 | NA |
| SAMD00162314        | DRR171302   | <i>M. interjectum</i>      | unknown  | Japan | Public | NA   | NA |

NA – not available

Table S2: Resistance, stress and virulence genes in 127 *M. simiae* complex isolates. \*Some isolates had two *acr3* genes located on different contigs. AMR-antimicrobial resistance.

| <b>AMR</b>       |                         |                     |            |
|------------------|-------------------------|---------------------|------------|
| <b>Gene</b>      | <b>antibiotic class</b> | <b>Isolates [n]</b> | <b>[%]</b> |
| aac(2')-Ic       | AMINOGLYCOSIDE          | 121                 | 95.3       |
| aac(2')-Ie       | AMINOGLYCOSIDE          | 2                   | 1.6        |
| abaF             | FOSFOMYCIN              | 114                 | 89.8       |
| aph(3')-Ia       | AMINOGLYCOSIDE          | 1                   | 0.8        |
| aph(3'')-Ib      | AMINOGLYCOSIDE          | 1                   | 0.8        |
| aph(6)-Id        | AMINOGLYCOSIDE          | 1                   | 0.8        |
| arr              | RIFAMYCIN               | 109                 | 85.8       |
| blaC             | BETA-LACTAM             | 3                   | 2.4        |
| blaE             | BETA-LACTAM             | 1                   | 0.8        |
| blaF             | BETA-LACTAM             | 34                  | 26.8       |
| blaLRA10         | BETA-LACTAM             | 2                   | 1.6        |
| blaS             | BETA-LACTAM             | 24                  | 18.9       |
| blaTEM           | BETA-LACTAM             | 1                   | 0.8        |
| dfrA3            | TRIMETHOPRIM            | 49                  | 38.6       |
| ImrC             | FOSFOMYCIN              | 1                   | 0.8        |
| narA             | IONOPHORE               | 4                   | 3.1        |
| rgt              | RIFAMYCIN               | 114                 | 89.8       |
| <b>STRESS</b>    |                         |                     |            |
| <b>Gene</b>      | <b>Type</b>             | <b>Isolates [n]</b> | <b>[%]</b> |
| acr3             | METAL                   | 56 (89*)            | 44.1       |
| arsA             | METAL                   | 2                   | 1.6        |
| arsC             | METAL                   | 126                 | 99.2       |
| arsN1            | METAL                   | 8                   | 6.3        |
| clpK             | HEAT                    | 2                   | 1.6        |
| golT             | METAL                   | 11                  | 8.7        |
| merC             | METAL                   | 4                   | 3.1        |
| qacE             | BIOCIDE                 | 1                   | 0.8        |
| trxLHR           | HEAT                    | 1                   | 0.8        |
| <b>VIRULENCE</b> |                         |                     |            |
| <b>Gene</b>      |                         | <b>Isolates [n]</b> | <b>[%]</b> |
| bpsD             |                         | 19                  | 15.0       |
| katP             |                         | 127                 | 100.0      |

Table S3: Specific cluster analysis of closely grouping isolates:

| <b>Cluster</b>   | <b>Patients</b> | <b>Number of isolates</b> | <b>Positions used (%)</b>    | <b>Median SNP distance</b> | <b>Range</b> |
|------------------|-----------------|---------------------------|------------------------------|----------------------------|--------------|
| <b>Cluster 1</b> | P1,P2,P3        | 25                        | 5692254/573108<br>9 (99.3 %) | 1                          | 0-5          |
| <b>Cluster 2</b> | P5              | 4                         | 5648931/593057<br>2 (95.3 %) | 2                          | 0-2          |
| <b>Cluster 3</b> | P4, P6          | 4                         | 6242158/631568<br>7 (98.8 %) | 0                          | 0            |

# Supplementary figures

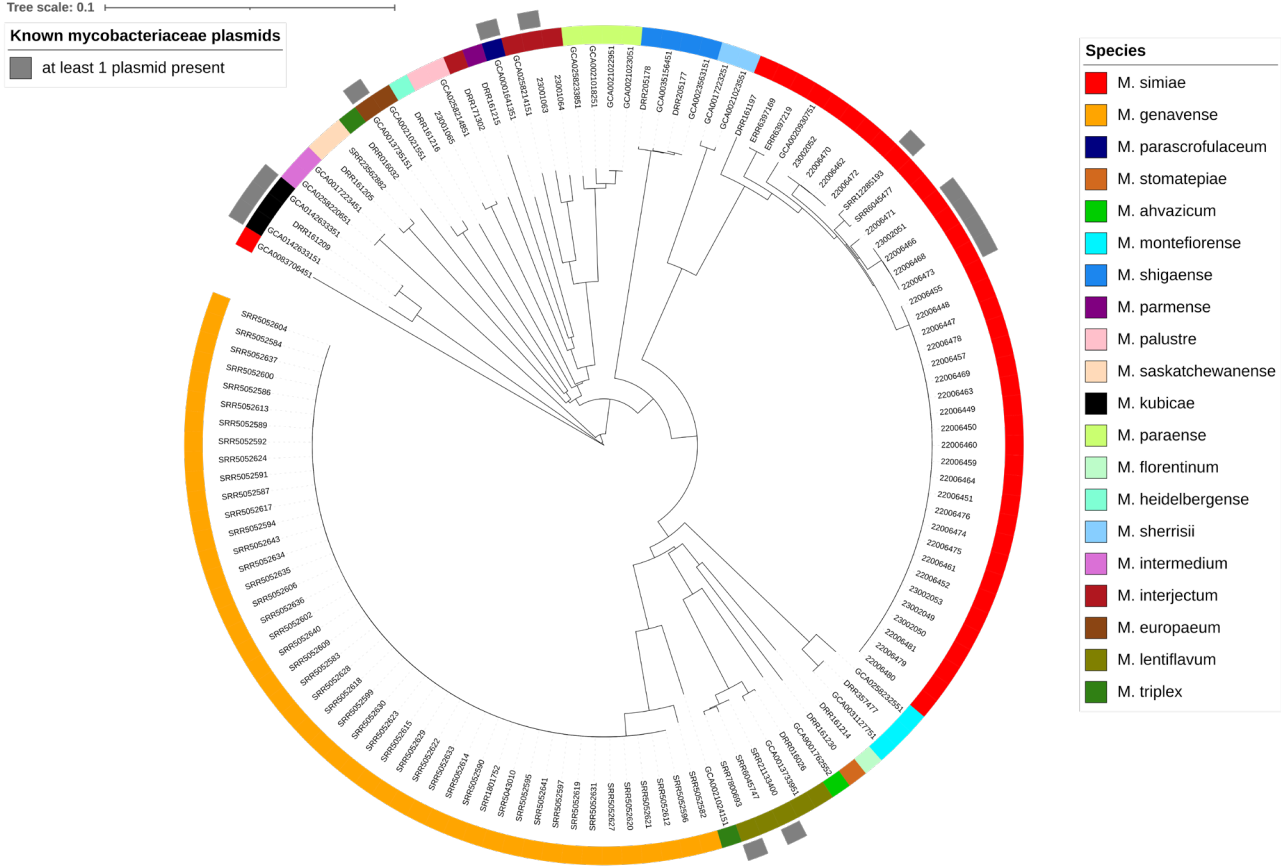

Figure S1: Presence of known mycobacteriaceae plasmids in *M. simiae* complex isolates.

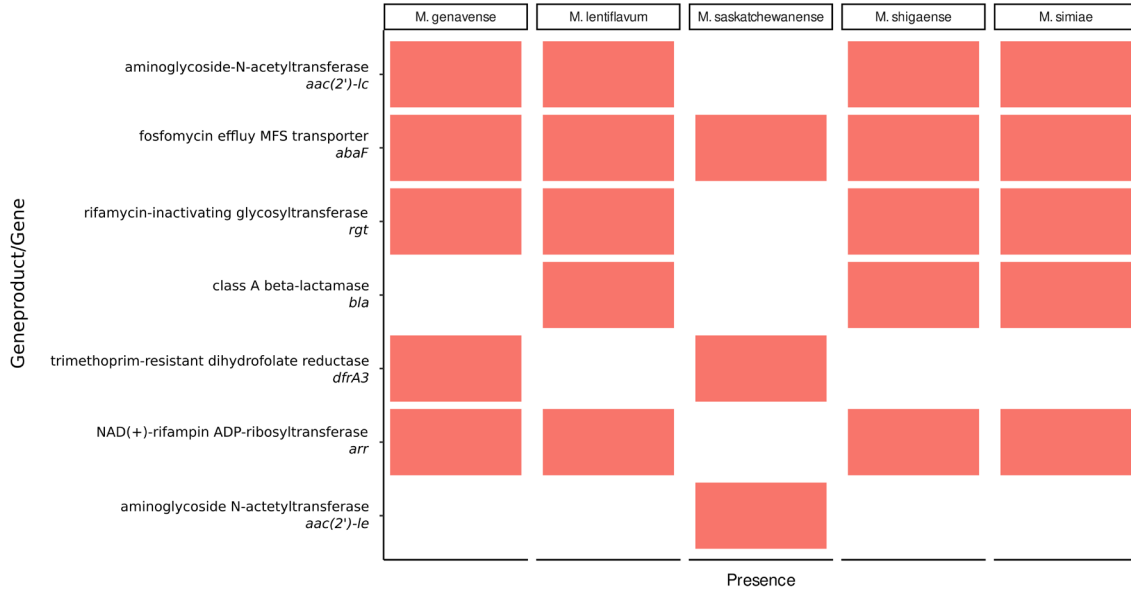

Figure S2: Presence of known antimicrobial resistance genes in different species of the *M. simiae* complex.

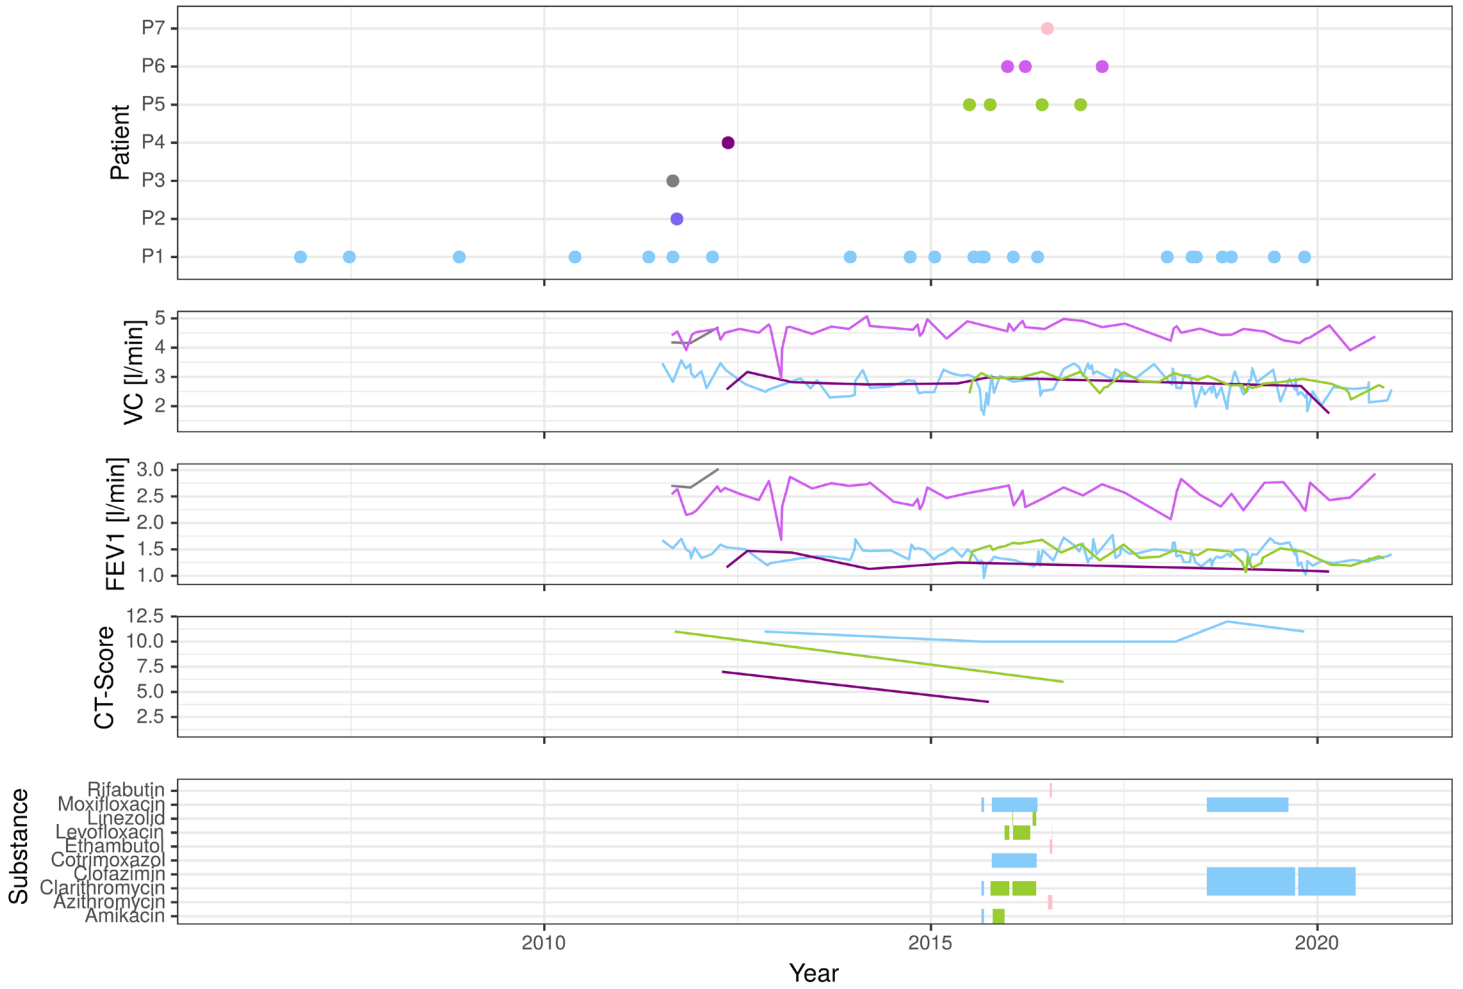

Figure S3: Timeline of included isolates, lung function, CT score after Song et al. and NTM therapy (detailed clinical information was only available from 2012 onwards). Colors represent the different patients according to the first plot panel. FEV1 – forced expiratory volume in one second; CT – computed tomography; NA – not applicable.
